# Supplementary material
Source: PubMed Central journal article supplement (PMC3303176)
Supplement: nar_34_9_2558__1.pdf [file nar_34_9_2558__1.pdf]

## Supplementary information

### Cloning and expression of new microRNAs from zebrafish

Wigard P. Kloosterman<sup>§</sup>, Florian A. Steiner<sup>§</sup>, Eugene Berezikov, Ewart de Bruijn, Jose van de Belt, Mark Verheul, Edwin Cuppen and Ronald H.A. Plasterk<sup>\*</sup>

Hubrecht Laboratory, Centre for Biomedical Genetics, Uppsalalaan 8, 3584 CT Utrecht, the Netherlands.

<sup>\*</sup>To whom correspondence should be addressed, E-mail: plasterk@niob.knaw.nl.

<sup>§</sup>Equal contribution

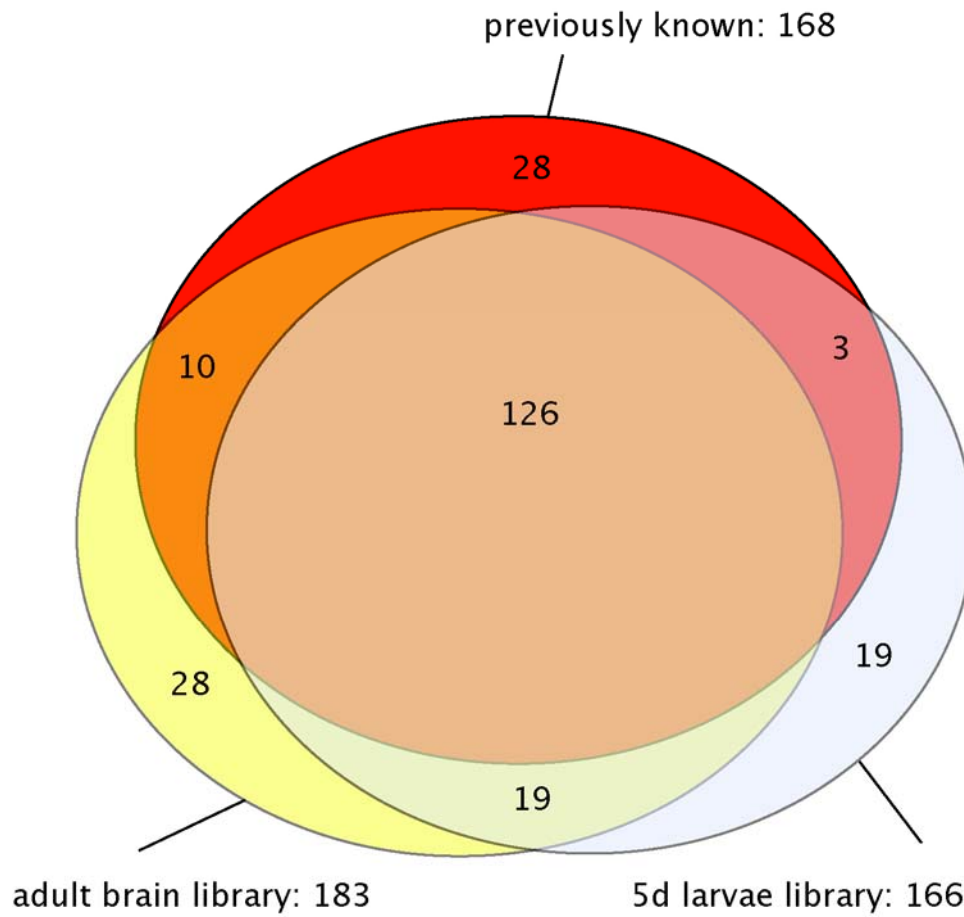

**Figure S1.** Venn-diagram of known zebrafish miRNAs from the miRNA registry, miRNAs cloned from the zf-brain library and miRNAs cloned from the zf-embryo library.

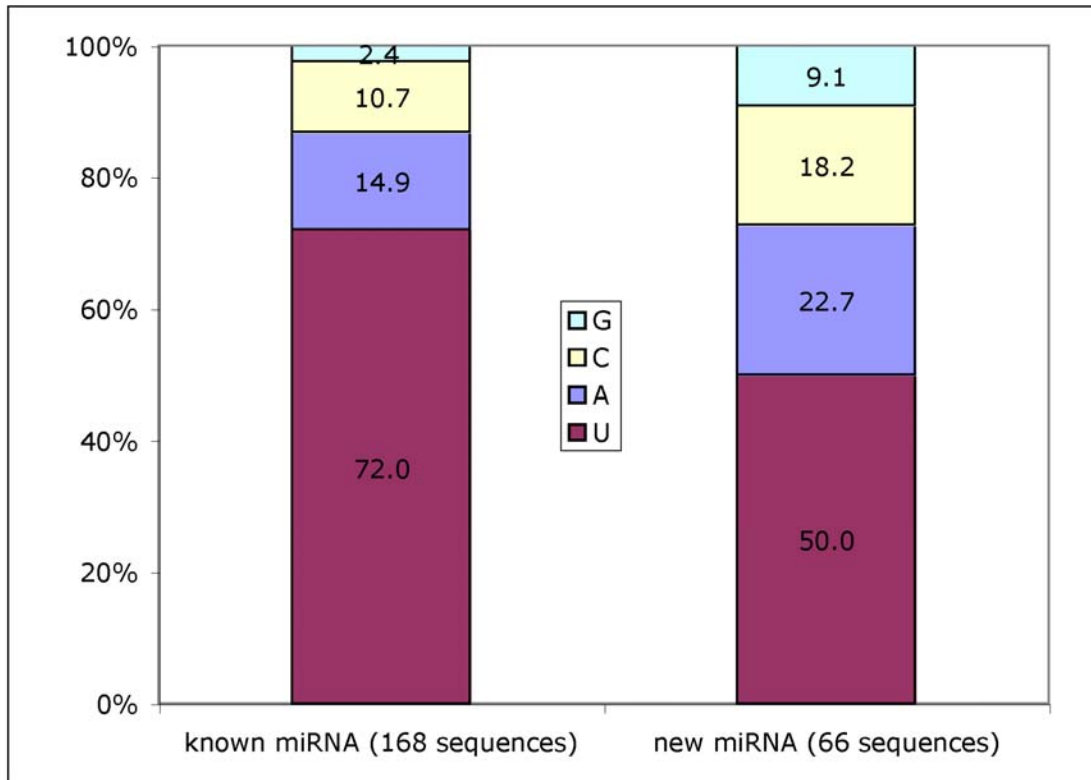

**Figure S2.** Bar diagram, showing the frequency of the base identity of the first base of known miRNAs (from the miRNA registry) and novel miRNAs cloned in this study.

Table S1. LNA probe sequences

| new ID                      | probe sequence           |
|-----------------------------|--------------------------|
| dre-miR-499                 | AAACATCACTGCAAGTCTTAAC   |
| ZF_nl_384                   | CCCAATAAGGTTCCCAGGGA     |
| dre-miR-731                 | CGATCCGGGAGAAAACGTGCATT  |
| ZF_nl_21                    | CAGTGTCGTTACTCCCAATCGTG  |
| dre-miR-723-5p <sup>1</sup> | AAAGTAACATCATTAAAACTGTC  |
| dre-miR-726-3p              | CCGAGTTCTGCTAGTAGTGAA    |
| dre-miR-489                 | AGCAGCCGTACATATGATGTCAC  |
| ZF_nl_149                   | GTACCCGAGTGATGTCTGAAACCA |
| ZF_nl_11                    | GAATCAGCGGAGTGGGGAGA     |
| dre-miR-15c                 | GAAAACCATGACGCGCTGCTT    |
| dre-miR-730-5p              | ACACACAGCATGCACAATGAGGA  |
| dre-miR-733                 | AACCACTGAGCTAAACCAACGCA  |
| dre-miR-34c-5p              | GTAATCAACTAACTGCACTGCCT  |
| dre-miR-739                 | AACCCTTCTCCACTTCGGCCT    |
| ZF_nl_236                   | ACCAATCCACCAGCTGTGCCCA   |
| ZF_nl_157                   | TGCCAGGGATTGTAGGTGTGA    |
| ZF_nl_286                   | CGCAGGCAACTTAAAAACAAGCC  |
| dre-miR-727-3p              | TAAGTCTTCAACTCGCCTCAAC   |
| dre-miR-725                 | ACTACTAGAAACAATGACTGAA   |
| dre-miR-735-3p              | GTCAAAGTTTAGCGGTGGGAGAG  |
| dre-miR-737-3p              | TATTTTCTTTAGGTTTTGATT    |
| dre-miR-734                 | CGGTACGATTCTGCAGCATTAC   |
| dre-miR-727-5p <sup>1</sup> | GCTGGGAGGAATTGAAGACTGA   |
| dre-miR-723-3p              | AGCACAGATTTAATTGATGTCTT  |
| dre-miR-730-3p <sup>1</sup> | CCTCCACATTGCAGGGCCTGTG   |
| dre-miR-34c-3p <sup>1</sup> | CCTGGTAGTGAGGTTAGTGATT   |
| dre-miR-732                 | ACCGAGAGTTCTCTGCTTTGAG   |
| dre-miR-729                 | AACCCAGGTCGTATCATACCCATG |
| ZF_nl_263                   | GACGTCAATTAGCGACCCGA     |
| dre-miR-724-5p              | CTTAAAAGGAAGGTGTGGCTG    |
| ZF_nl_51                    | ACTGACAGAATCAGCGGAGCCG   |
| ZF_nl_264                   | GAATGTACACTGGATGCAGACA   |
| dre-miR-728                 | GAAAACGTAGTGTACTTAGTAT   |
| ZF_nl_139                   | AATGGCAATATGGAGGCATAGCA  |
| dre-miR-722                 | AATCTGAAACGTTTCTGCAAAAAA |
| dre-miR-736                 | AAAACTTTTGTTCGCTTAC      |
| dre-miR-190b                | CAACCGAATATCAACATATCA    |
| dre-miR-726-5p <sup>1</sup> | AGTTCAGAACTAGCGGAATTCC   |
| dre-miR-738                 | GAGGTCCCAGCGCGGCCGTAGC   |
| ZF_nl_33                    | AAACTCTGCTAAAACAGGACTCA  |
| dre-miR-724-3p <sup>1</sup> | AAACAGTCGCAAATCCCTTTAA   |
| dre-miR-130c                | ATGCCCTTTTAAATTGCACTG    |
| dre-miR-451                 | AACTCAGTAATGGTAACGGTTT   |
| dre-miR-455                 | TGTATATGCCCATGGACTGCAT   |
| dre-miR-92b                 | GGAGGCCGGGACGAGTGCAATAT  |
| dre-miR-429                 | ACGGCATTACCAGACAGTATTA   |
| dre-miR-430a                | CTACCCCAACAATAGCACTTA    |
| dre-miR-130a                | ATGCCCTTTTAACTTGCCTG     |
| dre-miR-202                 | CAAAGAGGTATATGCATAGGAA   |
| dre-miR-365                 | ATAAGGATTTTTAGGGGCATTA   |
| dre-miR-101b                | CTTCAGTTATCATAGTACTGTA   |
| dre-miR-130b                | ATGCCCTTTTCAATTGCACTG    |
| dre-miR-135                 | CACATAGGAATAGAAAGCCATA   |
| dre-miR-187                 | GTTCCACTGGCTGCAACACAAG   |
| dre-miR-193b                | AGCGGGACTTTGCGGGCCAGTT   |
| dre-miR-27c                 | GCAGAACTTAACCACTGTGAA    |
| dre-miR-301b                | CAATGACAATACTATTGCACTG   |
| dre-miR-363                 | TACAGATGGATACCGTGCAATT   |
| dre-miR-454a                | CCCTATTAGCAATATTGCACTA   |
| dre-miR-454b                | CCCTATAAGCAATATTGCACTA   |
| dre-miR-430c                | CTACCCCAAGAGAAGCACTTA    |
| dre-miR-462                 | AGCTGCATTATGGGTTCCGTTA   |
| dre-miR-460                 | CGCACAGTGTGACAATGCAGG    |
| dre-miR-461                 | TTGGCATTTAGCCATTCTGTA    |
| dre-miR-430i                | CTACGCCAACAATAGCACTTA    |
| dre-miR-430b                | CTACCCCAACTTGATAGCACTTT  |
| dre-miR-430j                | TACCCCAATTTGATAGCACTTT   |
| dre-miR-456                 | TGACAACCATCTAACCAGCCTG   |
| dre-miR-457a                | TGCCAATATTGATGTGCTGCTT   |
| dre-miR-457b                | CTCCAGTATTTATGTGCTGCTT   |

dre-miR-458 GCAGTACCATTCAAAGAGCTAT  
 dre-miR-459 CAGGATGAATCCTTGTACTGA  
 dre-miR-740 ACTGTACCATCCACTTTTAT

<sup>†</sup>probes for miRNA star sequences

Table S2. Cloning frequency and conservation of known miRNAs from zebrafish

| mir ID       | brain | larvae | total | conservation                                                          |
|--------------|-------|--------|-------|-----------------------------------------------------------------------|
| dre-let-7a   | 155   | 13     | 168   | zfish,fugu,todon,chicken,opossum,chimp,human,macaca,cow,dog,mouse,rat |
| dre-let-7b   | 107   | 4      | 111   | zfish,fugu,todon,chicken,cow,dog,chimp,macaca,human,opossum,mouse,rat |
| dre-let-7c   | 39    | 4      | 43    | zfish,chicken,chimp,cow,dog,human,macaca,mouse,rat                    |
| dre-let-7d   | 44    | 10     | 54    | zfish,fugu,todon,chicken,chimp,cow,dog,human,macaca,mouse,rat         |
| dre-let-7e   | 7     | 1      | 8     | zfish,fugu,chicken,todon,cow                                          |
| dre-let-7f   | 6     | 0      | 6     | zfish,mouse,rat,chimp,cow,dog,human,macaca,opossum,chicken,todon      |
| dre-let-7g   | 6     | 4      | 10    | zfish,todon,fugu,chimp,dog,human,mouse,rat,macaca,opossum,cow,chicken |
| dre-let-7h   | 2     | 0      | 2     | zfish,todon,fugu,cow,chimp,human,macaca,rat,mouse,dog                 |
| dre-let-7j   | 2     | 0      | 2     | zfish,chimp,dog,macaca,mouse                                          |
| dre-miR-1    | 18    | 22     | 40    | zfish,todon,fugu,macaca,chicken,chimp,human,mouse,opossum,cow,dog,rat |
| dre-miR-100  | 298   | 41     | 339   | zfish,fugu,todon,mouse,rat,chimp,human,macaca,opossum,dog,cow         |
| dre-miR-101a | 24    | 5      | 29    | zfish,fugu,chimp,cow,dog,macaca,mouse,rat,todon,opossum,human         |
| dre-miR-103  | 17    | 2      | 19    | zfish,fugu,todon,chicken,opossum                                      |
| dre-miR-107  | 6     | 6      | 12    | zfish,fugu,todon,mouse,chimp,cow,human,macaca,rat,dog,chicken         |
| dre-miR-10a  | 38    | 43     | 81    | zfish,chimp,human,macaca,mouse,rat,cow,dog,opossum,chicken            |
| dre-miR-10b  | 18    | 25     | 43    | zfish,fugu,todon                                                      |
| dre-miR-10d  | 15    | 22     | 37    | zfish,mouse,rat,chimp,human,macaca,opossum,chicken,todon,fugu,cow,dog |
| dre-miR-122  | 14    | 18     | 32    | zfish,todon,fugu,chimp,human,dog,chicken                              |
| dre-miR-124  | 92    | 40     | 132   | zfish,fugu,todon,mouse,opossum,rat,chimp,human,dog,macaca,chicken,cow |
| dre-miR-125a | 776   | 73     | 849   | zfish,fugu                                                            |
| dre-miR-125b | 2357  | 201    | 2558  | zfish,todon,fugu,opossum,dog,chimp,human,macaca,rat,mouse             |
| dre-miR-125c | 163   | 17     | 180   | zfish                                                                 |
| dre-miR-126  | 39    | 5      | 44    | zfish,todon,fugu,mouse,dog                                            |
| dre-miR-128  | 450   | 9      | 459   | zfish                                                                 |
| dre-miR-129  | 255   | 12     | 267   | zfish,todon,fugu,chimp,human,dog,mouse,macaca,rat,opossum             |
| dre-miR-130a | 4     | 3      | 7     | zfish,chicken                                                         |
| dre-miR-130b | 10    | 8      | 18    | zfish,dog,chimp,macaca,rat,cow,mouse                                  |
| dre-miR-132  | 165   | 6      | 171   | zfish,todon,fugu                                                      |
| dre-miR-133a | 64    | 73     | 137   | zfish,mouse,opossum,chicken,dog,cow,fugu,chimp,human,macaca,rat,todon |
| dre-miR-133b | 33    | 38     | 71    | zfish,todon,chimp,human,macaca,opossum,rat,chicken,mouse              |
| dre-miR-133c | 13    | 18     | 31    | zfish,todon                                                           |
| dre-miR-135  | 61    | 31     | 92    | zfish,fugu,todon                                                      |
| dre-miR-135b | 16    | 17     | 33    | zfish                                                                 |
| dre-miR-137  | 48    | 28     | 76    | zfish,fugu,opossum,chicken,chimp,cow,dog,human,macaca,mouse,rat,todon |
| dre-miR-138  | 365   | 41     | 406   | zfish,fugu,todon,chicken,rat,dog,chimp,cow,human,macaca,mouse,opossum |
| dre-miR-140  | 14    | 19     | 33    | zfish,dog,chicken,mouse,chimp,human,macaca,rat,opossum,todon,fugu     |
| dre-miR-141  | 6     | 10     | 16    | zfish                                                                 |
| dre-miR-142a | 6     | 2      | 8     | zfish,todon,fugu,chimp,dog,human,macaca,rat,chicken,mouse,opossum     |
| dre-miR-142b | 5     | 2      | 7     | zfish,chicken,chimp,dog,human,macaca,rat,fugu,todon,mouse,opossum     |
| dre-miR-143  | 9     | 5      | 14    | zfish,rat,mouse,fugu,dog,human                                        |
| dre-miR-144  | 2     | 4      | 6     | zfish,fugu,todon,chicken                                              |
| dre-miR-145  | 21    | 7      | 28    | zfish,fugu                                                            |
| dre-miR-146a | 3     | 0      | 3     | zfish,todon                                                           |
| dre-miR-146b | 3     | 0      | 3     | zfish                                                                 |
| dre-miR-148  | 11    | 8      | 19    | zfish,todon,fugu                                                      |
| dre-miR-150  | 18    | 2      | 20    | zfish                                                                 |
| dre-miR-152  | 15    | 13     | 28    | zfish,cow,dog,mouse,rat,human,macaca,chimp                            |
| dre-miR-153a | 4     | 0      | 4     | zfish,chicken,opossum,chimp,cow,human,macaca,dog,fugu,rat,todon,mouse |
| dre-miR-153b | 12    | 8      | 20    | zfish,todon,fugu,opossum,cow,chimp,human,macaca,rat                   |
| dre-miR-15a  | 8     | 1      | 9     | zfish,todon                                                           |
| dre-miR-15b  | 2     | 4      | 6     | zfish                                                                 |
| dre-miR-16a  | 15    | 4      | 19    | zfish,fugu,todon,opossum,rat,cow,dog,chimp,chicken                    |
| dre-miR-16b  | 15    | 4      | 19    | zfish,todon,fugu                                                      |
| dre-miR-16c  | 5     | 5      | 10    | zfish                                                                 |
| dre-miR-17a  | 18    | 10     | 28    | zfish,chicken,opossum                                                 |
| dre-miR-181a | 264   | 131    | 395   | zfish,fugu,todon,chicken,cow,mouse,rat,opossum,chimp,human,macaca,dog |
| dre-miR-181b | 91    | 59     | 150   | zfish,mouse,rat,chicken,macaca,chimp,dog,human,opossum,cow,fugu,todon |
| dre-miR-181c | 16    | 11     | 27    | zfish                                                                 |
| dre-miR-182  | 18    | 15     | 33    | zfish,todon,fugu,opossum,mouse,macaca,dog,chimp,human                 |
| dre-miR-183  | 13    | 23     | 36    | zfish,fugu,opossum,todon,chicken,chimp,human,cow,dog,macaca,rat       |
| dre-miR-184  | 14    | 17     | 31    | zfish,fugu,todon,opossum,macaca,chimp,human,mouse                     |
| dre-miR-187  | 46    | 4      | 50    | zfish,todon,fugu                                                      |
| dre-miR-18a  | 5     | 13     | 18    | zfish,fugu,todon,chicken,cow,mouse,rat,chimp,dog,human,macaca,opossum |
| dre-miR-18c  | 4     | 3      | 7     | zfish                                                                 |
| dre-miR-190  | 2     | 1      | 3     | zfish,fugu,opossum,todon,chicken,chimp,cow,dog,human,macaca,mouse,rat |
| dre-miR-192  | 15    | 38     | 53    | zfish,todon,fugu                                                      |

|              |      |      |       |                                                                       |
|--------------|------|------|-------|-----------------------------------------------------------------------|
| dre-miR-193b | 6    | 1    | 7     | zfish                                                                 |
| dre-miR-194a | 43   | 57   | 100   | zfish,todon                                                           |
| dre-miR-194b | 2    | 0    | 2     | zfish                                                                 |
| dre-miR-196a | 2    | 3    | 5     | zfish,todon,fugu                                                      |
| dre-miR-196b | 0    | 2    | 2     | zfish                                                                 |
| dre-miR-199  | 117  | 122  | 239   | zfish,fugu,todon,chicken,cow,mouse,chimp,human,dog,opossum,macaca     |
| dre-miR-19a  | 58   | 63   | 121   | zfish,fugu,todon,chimp,cow,dog,human,macaca,opossum,rat,chicken,mouse |
| dre-miR-19b  | 153  | 130  | 283   | zfish,fugu,chimp,dog,human,cow                                        |
| dre-miR-19c  | 19   | 32   | 51    | zfish,chicken,opossum                                                 |
| dre-miR-19d  | 21   | 26   | 47    | zfish,todon                                                           |
| dre-miR-200a | 39   | 46   | 85    | zfish,fugu,todon,macaca,cow,mouse,rat,chicken                         |
| dre-miR-200b | 11   | 7    | 18    | zfish,fugu,todon,chicken,mouse,rat                                    |
| dre-miR-200c | 14   | 7    | 21    | zfish,fugu,cow,chicken                                                |
| dre-miR-203b | 88   | 125  | 213   | zfish,todon                                                           |
| dre-miR-204  | 14   | 9    | 23    | zfish,chicken,opossum,todon,fugu                                      |
| dre-miR-205  | 35   | 60   | 95    | zfish,fugu,todon,opossum                                              |
| dre-miR-20a  | 28   | 20   | 48    | zfish,fugu,todon,opossum                                              |
| dre-miR-20b  | 2    | 4    | 6     | zfish                                                                 |
| dre-miR-21   | 95   | 10   | 105   | zfish,fugu,todon,chicken,mouse,opossum                                |
| dre-miR-210  | 55   | 25   | 80    | zfish,todon,fugu                                                      |
| dre-miR-212  | 40   | 3    | 43    | zfish,fugu,todon                                                      |
| dre-miR-214  | 4    | 2    | 6     | zfish,fugu,todon,opossum,chimp,cow,dog,human,macaca,mouse,rat         |
| dre-miR-216a | 10   | 18   | 28    | zfish                                                                 |
| dre-miR-216b | 13   | 17   | 30    | zfish,todon,fugu                                                      |
| dre-miR-217  | 11   | 17   | 28    | zfish,chicken,todon,chimp,human,macaca,fugu,dog,mouse,opossum,rat     |
| dre-miR-218a | 29   | 39   | 68    | zfish,fugu,todon                                                      |
| dre-miR-218b | 21   | 21   | 42    | zfish,todon,fugu                                                      |
| dre-miR-219  | 206  | 129  | 335   | zfish,todon,fugu,cow,rat                                              |
| dre-miR-221  | 250  | 39   | 289   | zfish,todon,fugu,cow,mouse,rat,chimp,human,macaca,dog,opossum,chicken |
| dre-miR-222  | 160  | 22   | 182   | zfish,fugu,todon,chicken,rat,human,macaca,dog,mouse,opossum,cow       |
| dre-miR-223  | 3    | 1    | 4     | zfish,todon,fugu                                                      |
| dre-miR-22a  | 102  | 58   | 160   | zfish,fugu,todon,chicken,dog,opossum,chimp,cow,human,mouse,rat        |
| dre-miR-22b  | 4    | 1    | 5     | zfish,todon,fugu                                                      |
| dre-miR-23a  | 6    | 7    | 13    | zfish,fugu,todon                                                      |
| dre-miR-24   | 31   | 10   | 41    | zfish,cow,chimp,dog,human,macaca,mouse,rat                            |
| dre-miR-25   | 9    | 12   | 21    | zfish,fugu,todon,dog,opossum,human,macaca,mouse                       |
| dre-miR-26a  | 51   | 22   | 73    | zfish,todon,fugu                                                      |
| dre-miR-27a  | 2    | 1    | 3     | zfish,fugu,todon,opossum                                              |
| dre-miR-27b  | 17   | 2    | 19    | zfish,chicken,chimp,human,macaca,mouse,rat,cow,dog,fugu,todon,opossum |
| dre-miR-27c  | 1    | 1    | 2     | zfish                                                                 |
| dre-miR-27d  | 3    | 1    | 4     | zfish,opossum,cow,chimp,human,macaca,mouse,rat,dog,chicken,fugu,todon |
| dre-miR-27e  | 4    | 1    | 5     | zfish,todon,fugu                                                      |
| dre-miR-29a  | 19   | 4    | 23    | zfish,todon,cow,fugu,chicken,opossum,dog,rat                          |
| dre-miR-29b  | 3    | 1    | 4     | zfish                                                                 |
| dre-miR-301a | 13   | 4    | 17    | zfish,rat,mouse,chicken,dog,chimp,human,macaca,opossum                |
| dre-miR-301b | 4    | 8    | 12    | zfish,fugu,todon                                                      |
| dre-miR-301c | 6    | 9    | 15    | zfish,todon,fugu                                                      |
| dre-miR-30b  | 17   | 9    | 26    | zfish,fugu,todon                                                      |
| dre-miR-30c  | 66   | 20   | 86    | zfish                                                                 |
| dre-miR-30d  | 38   | 6    | 44    | zfish                                                                 |
| dre-miR-30e  | 23   | 22   | 45    | zfish,todon,fugu,chicken                                              |
| dre-miR-338  | 64   | 3    | 67    | zfish,fugu,todon                                                      |
| dre-miR-34   | 28   | 6    | 34    | zfish,todon,chicken,macaca,chimp,human,opossum,dog,cow,mouse,rat      |
| dre-miR-363  | 5    | 5    | 10    | zfish,dog,human,macaca,rat,mouse,opossum                              |
| dre-miR-365  | 7    | 2    | 9     | zfish,fugu,todon,chicken,cow,dog,human,macaca,mouse,rat,opossum,chimp |
| dre-miR-375  | 10   | 12   | 22    | zfish,fugu,todon                                                      |
| dre-miR-429  | 0    | 4    | 4     | zfish,fugu,todon,cow,mouse,rat,dog,human,chicken,chimp,opossum,macaca |
| dre-miR-454a | 2    | 2    | 4     | zfish,macaca,chicken,chimp,human,cow,dog,fugu                         |
| dre-miR-454b | 7    | 9    | 16    | zfish                                                                 |
| dre-miR-455  | 5    | 7    | 12    | zfish,todon,fugu,chicken,opossum,chimp,dog,human,macaca,rat,mouse     |
| dre-miR-456  | 13   | 2    | 15    | zfish                                                                 |
| dre-miR-457a | 2    | 0    | 2     | zfish                                                                 |
| dre-miR-457b | 0    | 3    | 3     | zfish                                                                 |
| dre-miR-458  | 2    | 4    | 6     | zfish,chicken,fugu                                                    |
| dre-miR-460  | 2    | 1    | 3     | zfish,fugu                                                            |
| dre-miR-462  | 2    | 0    | 2     | zfish                                                                 |
| dre-miR-7b   | 35   | 9    | 44    | zfish,fugu,macaca,mouse,opossum,chimp,human,rat,cow,dog,chicken       |
| dre-miR-9    | 811  | 467  | 1278  | zfish,fugu,todon,opossum,chimp,cow,dog,human,macaca,mouse,rat,chicken |
| dre-miR-92a  | 20   | 18   | 38    | zfish,chimp,human,chicken,opossum,cow,dog,rat,fugu,todon              |
| dre-miR-92b  | 7    | 0    | 7     | zfish                                                                 |
| dre-miR-93   | 38   | 32   | 70    | zfish                                                                 |
| dre-miR-96   | 6    | 11   | 17    | zfish,todon,fugu,opossum,cow,chimp,human,mouse,dog,rat                |
| dre-miR-99   | 166  | 34   | 200   | zfish,dog,chimp,cow,human,macaca,rat,chicken,mouse                    |
| total        | 9607 | 3150 | 12757 |                                                                       |

Table S3. Sequences, cloning frequency and conservation of new miRNA from zebrafish

| miRNA                     | sequence                   | brain | larvae | cloned total | conservation                                                      |
|---------------------------|----------------------------|-------|--------|--------------|-------------------------------------------------------------------|
| >ZF_nl_107                | CTTCAGAGCTGAGGTGAG         | 1     | 0      | 1            | zfish                                                             |
| >ZF_nl_108                | ACAGTCTCTCGGAGCGCTCG       | 1     | 0      | 1            | zfish                                                             |
| >ZF_nl_11                 | TCTCCCCACTCCGCTGATTTC      | 1     | 0      | 1            | zfish                                                             |
| >dre-miR-724              | TAAAGGGAATTTGCGACTGTT      | 21    | 0      | 21           | zfish,fugu,todon                                                  |
| >dre-miR-725              | TTCAGTCATTGTTTCTAGTAGT     | 5     | 7      | 12           | zfish                                                             |
| >dre-miR-726              | TTCACTACTAGCAGAACTCGG      | 4     | 1      | 5            | zfish,todon,fugu                                                  |
| >ZF_nl_125                | TAATACTGCCTGGTAATGCCAT     | 1     | 0      | 1            | zfish                                                             |
| >ZF_nl_135                | TTGCAGGTTCAATTCCTGTC       | 0     | 1      | 1            | zfish                                                             |
| >ZF_nl_138                | TAGCACCAATTTGAAATCGGTCCG   | 1     | 1      | 2            | zfish,opossum                                                     |
| >ZF_nl_139                | TGCTATGCCTCCATATTGCCATT    | 2     | 0      | 2            | zfish                                                             |
| >ZF_nl_149                | TGGTTTCAGACATCACTCGGGTAC   | 0     | 1      | 1            | zfish                                                             |
| >ZF_nl_157                | TCACACCTACAATCCCTGGCA      | 5     | 0      | 5            | zfish                                                             |
| >ZF_nl_164                | GAACCTGATGGATCTTCTCT       | 0     | 1      | 1            | zfish                                                             |
| >dre-miR-727              | GTTGAGCGGAGTTGAAGACTTA     | 13    | 4      | 17           | zfish,fugu,todon                                                  |
| >dre-miR-728              | ATACTAAGTACACTACGTTTTTC    | 0     | 2      | 2            | zfish,todon                                                       |
| >ZF_nl_176                | TATGGCTTTTTATTCCCTATGTG    | 5     | 2      | 7            | zfish,todon                                                       |
| >dre-miR-729              | CATGGGTATGATACGACCTGGGTT   | 1     | 3      | 4            | zfish                                                             |
| >ZF_nl_21                 | CACGATTGGGAGTAACGACACTG    | 0     | 1      | 1            | zfish                                                             |
| >ZF_nl_210                | TGAGCGGCTCAGTGAGGTCTCGGATC | 2     | 0      | 2            | zfish                                                             |
| >ZF_nl_224                | ACAGGCATGTGTGTGGGTAGAG     | 1     | 0      | 1            | zfish                                                             |
| >dre-miR-190b             | TGATATGTTTTGATATTCGGTTG    | 17    | 24     | 41           | zfish,fugu,todon                                                  |
| >ZF_nl_230                | CTGTGCCGAAAGACCTGGAACAAAC  | 1     | 0      | 1            | zfish                                                             |
| >ZF_nl_231                | ACTGAGCTGCTGATCCCG         | 0     | 1      | 1            | zfish,cow,dog,chimp,human,mouse,macaca                            |
| >ZF_nl_236                | TGGGCACAGCTGGTGGATTGGT     | 1     | 0      | 1            | zfish                                                             |
| >ZF_nl_240                | TATTGTTATTCTGCTGGTT        | 1     | 0      | 1            | zfish                                                             |
| >dre-miR-34c              | AGGCAGTGCAGTTAGTTGATTAC    | 0     | 2      | 2            | zfish                                                             |
| >ZF_nl_249                | TCAGTGCATTACAGAACTTTG      | 8     | 7      | 15           | zfish                                                             |
| >dre-miR-722              | TTTTTTGCAGAAACGTTTCAGATT   | 1     | 1      | 2            | zfish,fugu,todon                                                  |
| >ZF_nl_254                | TGAATCTGGTCCCTCTGG         | 0     | 1      | 1            | zfish                                                             |
| >dre-miR-730              | TCCTCATTGTGCATGCTGTGTGT    | 10    | 3      | 13           | zfish,todon                                                       |
| >ZF_nl_263                | TCGGGTCGCTAATGACGTC        | 1     | 0      | 1            | zfish                                                             |
| >ZF_nl_264                | TGTCTGCATCCAGTGTACATTC     | 1     | 0      | 1            | zfish                                                             |
| >dre-miR-731              | AATGACACGTTTTCTCCCGGATCG   | 3     | 1      | 4            | zfish                                                             |
| >ZF_nl_286                | GGCTTGTTTTAAGTTGCCTGCG     | 0     | 1      | 1            | zfish,fugu,todon,chicken                                          |
| >ZF_nl_29                 | CTCTGCACTTCATTAGTG         | 1     | 0      | 1            | zfish                                                             |
| >ZF_nl_290                | CGGTCCGGGGCGTCAGTGCC       | 0     | 1      | 1            | zfish                                                             |
| >dre-miR-732              | CTCAAAGCAGAGAACTCTCGGT     | 0     | 1      | 1            | zfish                                                             |
| >ZF_nl_298                | TGAGGTGGTTTTCTGTAC         | 0     | 1      | 1            | zfish                                                             |
| >ZF_nl_300                | GCCAAATGCCTCGTCATCTAAT     | 2     | 0      | 2            | zfish,cow                                                         |
| >ZF_nl_302                | CTCGTACCGTGAGTAATAGTGC     | 10    | 10     | 20           | zfish,todon,fugu                                                  |
| >ZF_nl_304                | CCTGAGACCCGGGTTTTGTT       | 1     | 0      | 1            | zfish                                                             |
| >dre-miR-733              | TGCGTTGGTTTAGCTCAGTGGTT    | 1     | 1      | 2            | zfish                                                             |
| >dre-miR-15c              | AAGCAGCGCGTCATGGTTTTTC     | 1     | 0      | 1            | zfish                                                             |
| >ZF_nl_325                | TCTACAGTGCATGTGTCTCCAGT    | 31    | 2      | 33           | zfish,opossum,fugu,todon                                          |
| >ZF_nl_33                 | TGAGTCTGTTTTAGCAGAGTTT     | 1     | 0      | 1            | zfish                                                             |
| >dre-miR-734              | GTAATGCTGCAGAAATCGTACCG    | 3     | 1      | 4            | zfish                                                             |
| >ZF_nl_345                | AAAATATCCTGAGCTGTTTTCT     | 1     | 0      | 1            | zfish                                                             |
| >ZF_nl_350                | ATGCAGTCCATGGGCATATACACT   | 9     | 7      | 16           | zfish,fugu,chicken,dog,todon,opossum,chimp,human,macaca,rat,mouse |
| >ZF_nl_372                | TCCCTCCGTCATTGAATTCCTG     | 1     | 0      | 1            | zfish                                                             |
| >ZF_nl_376                | ACGAGAGCTGGGGTCTTGCTGG     | 0     | 1      | 1            | zfish                                                             |
| >dre-miR-735              | CTCTCCCACCGCTAAACTTGAC     | 19    | 0      | 19           | zfish                                                             |
| >ZF_nl_384                | TCCCTGGGAACCTTATTGGG       | 1     | 0      | 1            | zfish                                                             |
| >ZF_nl_39                 | TTTACAGGCTATGCTAATCTAT     | 1     | 0      | 1            | zfish,fugu,todon                                                  |
| >dre-miR-736 <sup>1</sup> | GTAAGACGAACAAAAAGTTTT      | N.D.  | N.D.   | N.D.         | zfish,fugu                                                        |
| >dre-miR-737              | AATCAAAACCTAAAGAAAATA      | 0     | 7      | 7            | zfish                                                             |
| >dre-miR-738              | GCTACGGCCCGCTCGGGACCTC     | 4     | 0      | 4            | zfish                                                             |
| >dre-miR-739              | AGGCCGAAGTGAGAGAAGGGTT     | 0     | 1      | 1            | zfish,mouse,chicken                                               |
| >ZF_nl_51                 | CGGCTCCGCTGATTCTGTCAGT     | 1     | 0      | 1            | zfish                                                             |
| >ZF_nl_58                 | TCAGAAAAGTTACCACAGGGAT     | 0     | 1      | 1            | zfish,rat,cow                                                     |
| >ZF_nl_63                 | CCGCAACACGAAACTGTCTT       | 0     | 1      | 1            | zfish,fugu                                                        |
| >dre-miR-499              | TTAAGACTTCAGTGATGTTTA      | 6     | 15     | 21           | zfish,todon,fugu,chicken                                          |
| >ZF_nl_68                 | AGACACTGAGGGGTGTAG         | 0     | 1      | 1            | zfish                                                             |
| >dre-miR-723              | AAGACATCAATTAATCTGTGCT     | 3     | 3      | 6            | zfish                                                             |
| >ZF_nl_9                  | TGAACACGGTCTCTTTTT         | 1     | 0      | 1            | zfish                                                             |
| >ZF_nl_91                 | TGTCTGTCTCCCGCTTTCT        | 1     | 0      | 1            | zfish                                                             |
| >ZF_nl_94                 | AGGCGATGGGCATCATGAACCTGTT  | 0     | 1      | 1            | zfish,dog,fugu,opossum                                            |
| >dre-miR-489 <sup>2</sup> | TGACATCATATGACGGCTGCT      | 9     | 1      | 10           | zfish,todon,fugu,chicken                                          |
| total                     |                            | 216   | 121    | 337          |                                                                   |

N.D.=no data

<sup>1</sup>cloned from human and conserved in zebrafish<sup>2</sup>predicted in zebrafish based on hsa-miR-489

Table S4. microRNA hairpins assigned for cloned sequences  
miRNA hairpin IDs

| miRNA hairpin IDs                                                                                       | miRNA sequence              |
|---------------------------------------------------------------------------------------------------------|-----------------------------|
| ZF_nl_107 ZF_nl_110 ZF_nl_114 ZF_nl_116 ZF_nl_117 ZF_nl_119                                             | CTTCAGAGCTGAGGTGAG          |
| ZF_nl_108                                                                                               | ACAGTCTCTCGGAGCGCTCG        |
| ZF_nl_11 ZF_nl_34 ZF_nl_55 ZF_nl_56 ZF_nl_65 ZF_nl_66 ZF_nl_235 ZF_nl_269 ZF_nl_292 ZF_nl_317 ZF_nl_324 | TCTCCCACTCCGCTGATTCT        |
| dre-miR-724-5p ZF_nl_272 ZF_nl_273                                                                      | TTAAAGGGAATTTGCGACTGTT      |
| dre-miR-724-3p ZF_nl_272 ZF_nl_273                                                                      | CAGCCACACCTTCCTTTTAAG       |
| dre-miR-725 ZF_nl_378                                                                                   | TTCAGTCAATTTTCTAGTAGT       |
| dre-miR-726-5p ZF_nl_134                                                                                | GGAATTCGCTAGTTCTGAACT       |
| dre-miR-726-3p ZF_nl_134                                                                                | TTCCTACTAGCAGAACTCGG        |
| ZF_nl_125                                                                                               | TAATACTGCCTGGTAATGCCAT      |
| ZF_nl_135                                                                                               | TTGCAGGTTCAATTCCTGTC        |
| ZF_nl_138                                                                                               | TAGCACCATTTGAAATCGGTGCG     |
| ZF_nl_139                                                                                               | TGCTATGCCTCCATATTGCCATT     |
| ZF_nl_149                                                                                               | TGGTTTCAGACATCACTCGGGTAC    |
| ZF_nl_157                                                                                               | TCACACCTACAACTCCCTGGCA      |
| ZF_nl_164 ZF_nl_207 ZF_nl_348 ZF_nl_349 ZF_nl_360 ZF_nl_368 ZF_nl_369                                   | GAACCTGATGGATCTTCTCT        |
| dre-miR-727-5p                                                                                          | TCAGTCTTCAATTCCTCCAGC       |
| dre-miR-727-3p                                                                                          | GTTGAGGCGAGTTGAAGACTTA      |
| dre-miR-728                                                                                             | ATACTAAGTACACTACGTTTTTC     |
| ZF_nl_176                                                                                               | TATGGCTTTTTATTCCTATTGTG     |
| dre-miR-729                                                                                             | CATGGGTATGATACAGCTGGGTT     |
| ZF_nl_21                                                                                                | CACGATGGGATTAACGACACTG      |
| ZF_nl_210_5p ZF_nl_212 ZF_nl_215 ZF_nl_217                                                              | TGAGGCGCTCAGTGAGGCTCCGGATC  |
| ZF_nl_210_3p ZF_nl_211 ZF_nl_212 ZF_nl_213 ZF_nl_214 ZF_nl_215 ZF_nl_216 ZF_nl_217 ZF_nl_342            | TCGTAACAAGGTTTCCCGT         |
| ZF_nl_224                                                                                               | ACAGGCATGTGTGGGTAGAG        |
| dre-miR-190b                                                                                            | TGATATGTTTGATATTCCGTTG      |
| ZF_nl_230                                                                                               | CTGTGCCGAAAGACCTGGAACAAAC   |
| ZF_nl_231 ZF_nl_234 ZF_nl_362                                                                           | ACTGAGCTGCTGATCCGC          |
| ZF_nl_236 ZF_nl_379                                                                                     | TGGGCACAGCTGGTGGATTGGT      |
| ZF_nl_240                                                                                               | TATTGTTATTCCTGCTGGTT        |
| dre-miR-34c-5p ZF_nl_243                                                                                | AGGCAGTGCAGTTAGTTGATTAC     |
| dre-miR-34c-3p ZF_nl_243                                                                                | AATCACTAACCTCACTACCAGG      |
| ZF_nl_249                                                                                               | TCAGTGCATTACAGAATTTTG       |
| dre-miR-722 ZF_nl_35 ZF_nl_185                                                                          | TTTTTGCAGAAAGCTTTCAGATT     |
| ZF_nl_254 ZF_nl_344                                                                                     | TGAATCTGGTCCCTCTGG          |
| dre-miR-730-5p                                                                                          | TCCTCATTGTGCATGCTGTGT       |
| dre-miR-730-3p                                                                                          | CACAGCGCTGCAATGTGGAGG       |
| ZF_nl_263                                                                                               | TGGGTGCGTAAATGACGTC         |
| ZF_nl_264                                                                                               | TGTCTGCATCCAGTGTACATTC      |
| dre-miR-731 ZF_nl_330                                                                                   | AATGACAGTTTTCTCCCGGATCG     |
| ZF_nl_286                                                                                               | GGCTTGTTTAAGTTGCCTGCG       |
| ZF_nl_29                                                                                                | CTCTGCACTTCAATTAGTG         |
| ZF_nl_290 ZF_nl_291                                                                                     | CGGTCCGGGGCGTCAGTGCC        |
| dre-miR-732 ZF_nl_299                                                                                   | CTCAAAGCAGAACTCTCGGT        |
| ZF_nl_298                                                                                               | TGAGGTGGTTTTCTGTGTCAC       |
| ZF_nl_300 ZF_nl_336                                                                                     | GCCAAATGCCTCGTCATCTAAT      |
| ZF_nl_302_5p                                                                                            | CATTATTACTTTTTGGTACGCG      |
| ZF_nl_302_3p                                                                                            | CTCGTACCGTGAGTAATAGTGC      |
| ZF_nl_304                                                                                               | CCTGAGACCCGGTTTTGTT         |
| dre-miR-733                                                                                             | TGCGTTGGTTTTAGCTCAGTGGTT    |
| dre-miR-15c                                                                                             | AAGCAGCGCGTCAATGTTTTTC      |
| ZF_nl_325                                                                                               | TCTACAGTGCATGTGCTCCAGT      |
| ZF_nl_33                                                                                                | TGAGTCTGTTTTAGCAGAGTTT      |
| dre-miR-734                                                                                             | GTAATGCTGCAGAACTGACCG       |
| ZF_nl_345                                                                                               | AAAATATCCTGAGCTGTTTTCT      |
| ZF_nl_350_5p                                                                                            | TATGTGCCCTTGGACTACATTTG     |
| ZF_nl_350_3p                                                                                            | ATGCAGTCCATGGGCATATACACT    |
| ZF_nl_372                                                                                               | TCCCTCCGTCAATGAATTCCTG      |
| ZF_nl_376                                                                                               | ACGAGAGCTGGGGTCTTGCTGG      |
| dre-miR-735-5p                                                                                          | GGCTGGTCCGAAAGGCGGTGGTTAGTC |
| dre-miR-735-3p                                                                                          | CTCTCCACCGCTAAACTTGAC       |
| ZF_nl_384                                                                                               | TCCCTGGGAACCTTATTGGG        |
| ZF_nl_39                                                                                                | TTTACAGGCTATGCTAATCTAT      |
| dre-miR-736 <sup>1</sup>                                                                                | GTAAGACGAAACAAAAGTTTT       |
| dre-miR-737-5p                                                                                          | GTTTTTTTAGGTTTTGATTTT       |
| dre-miR-737-3p                                                                                          | AATCAAAACCTAAAGAAAATA       |
| dre-miR-738                                                                                             | GCTACGGCCCGCTCGGGACCTC      |
| dre-miR-739                                                                                             | AGGCCGAAGTGGAGAAGGGTT       |
| ZF_nl_51 ZF_nl_89 ZF_nl_90 ZF_nl_343                                                                    | CGGCTCCGCTGATTCTGTGAGT      |
| ZF_nl_58                                                                                                | TCAGAAAAGTTACCACAGGGAT      |
| ZF_nl_63                                                                                                | CCGCAACACGAAACTGTCTT        |
| dre-miR-499 ZF_nl_233                                                                                   | TTAAGACTTGGAGTGATGTTTA      |
| ZF_nl_68                                                                                                | AGACTGAGGGGTGTAG            |
| dre-miR-723-5p                                                                                          | GACAGTTTTAATATGATTTACTTT    |
| dre-miR-723-3p                                                                                          | AAGACATCAATTAATCTGTGCT      |
| ZF_nl_9                                                                                                 | TGAACACGGTCTCTTTTT          |
| ZF_nl_91                                                                                                | TGTCTGTCTCCCGCTTTCT         |
| ZF_nl_94 ZF_nl_363                                                                                      | AGGCGATGGGCATCATGAACCTGTT   |
| miR-489 <sup>2</sup>                                                                                    | TGACATCATATGTACGGCTGCT      |

<sup>1</sup>cloned from human and conserved in zebrafish

<sup>2</sup>predicted in zebrafish based on hsa-miR-489



Table S5. miRNA and star sequences of known miRNAs

| miRNA       | sequence                 | number of clones |
|-------------|--------------------------|------------------|
| let-7b      | TGAGGTAGTAGGTTGTGTGGT    | 109              |
| let-7b*     | CTATACAACCTACTGCCTTCCC   | 2                |
| miR-1       | TGGAATGTAAAGAAGTATGTATT  | 39               |
| miR-1*      | ACATACTTCTTTATGTGCCCAT   | 1                |
| miR-100*    | CAAGCTCGTGTCTATAGGTATG   | 2                |
| miR-100     | AACCCGTAGATCCGAACTTGT    | 337              |
| miR-103     | AGCAGCATTGTACAGGGCTATGA  | 17               |
| miR-103*    | AGCCTCTTACGGTGTGCCTTG    | 2                |
| miR-107     | AGCAGCATTGTACAGGGCTATCA  | 10               |
| miR-107*    | AGCTTCTTACAGTGTGTCTTG    | 2                |
| miR-10b     | TACCCGTAGAACCGAATTGTG    | 42               |
| miR-10b*    | CAAATACGTCTCTACAGGAAT    | 1                |
| miR-124     | TAAGGCACGCGGTGAATGCC     | 123              |
| miR-124*    | TGTGTTACAGTGGACCTTGATT   | 9                |
| miR-125a    | TCCCTGAGACCCTAACCTGTGAG  | 848              |
| miR-125a*   | ACAGGTGAGGTCTCAGGAAC     | 1                |
| miR-125b    | TCCCTGAGACCCTAACTTGTGA   | 2553             |
| miR-125b*   | ACGGGTTAGGTTCTTGGGAGCT   | 5                |
| miR-126*    | CATTACTTTTGGTACGCG       | 2                |
| miR-126     | TCGTACCGTGAGTAATAATGC    | 42               |
| miR-128     | TCACAGTGAACCGTCTCTTTT    | 458              |
| miR-128*    | CGGGCCGTGGCACTGTATGAG    | 1                |
| miR-129*    | AAGCCCTTACCCAAAAAGTAT    | 205              |
| miR-129     | CTTTTGGCGTCTGGGCTTGC     | 62               |
| miR-130b*   | ACTCTTCCCTGTTGCACTACTG   | 10               |
| miR-130b    | CAGTGAATAATGAAAGGGCAT    | 8                |
| miR-132     | TAACAGTCTACAGCCATGGTCC   | 169              |
| miR-132*    | ACCGTGGCTTTAGATTGTACT    | 2                |
| miR-133a*   | AGCTGGTAAAATGGAACCAAAT   | 1                |
| miR-133a    | TTTGGTCCCCTCAACCAGCTGT   | 136              |
| miR-135     | TATGGCTTCTATTCCTATGTG    | 91               |
| miR-135*    | ACATAGGGTTCAAAGCCATTGG   | 1                |
| miR-135b*   | TATAGGGATGGAAGCCATGCAG   | 5                |
| miR-135b    | TATGGCTTTTATTCCTATCTGA   | 28               |
| miR-137     | TTATTGCTAAGAATACGCGTAG   | 74               |
| miR-137*    | ACGGGTATTCTTGGGTGGATAAT  | 2                |
| miR-138     | AGCTGGTGTGTGAATCAGGCCG   | 401              |
| miR-138*    | GCTATTCACAACACCAGGGT     | 5                |
| miR-140     | CAGTGGTTTACCCTATGGT      | 26               |
| miR-140*    | TACCACAGGGTAGAACCCACGG   | 7                |
| miR-142a-3p | TGTAGTGTTCCTACTTTATGG    | 6                |
| miR-142a-5p | CATAAAGTAGAAAGCACTACT    | 2                |
| miR-142b-3p | TGTAGTGTTCCTACTTTATGG    | 6                |
| miR-142b-5p | CATAAAGTAGAGCACTACTA     | 1                |
| miR-143*    | GGTGCAGTGTCTCATCTCTGG    | 2                |
| miR-143     | TGAGATGAAGCACTGTAGCTC    | 12               |
| miR-144*    | GGATATCATCGTATACTGTAAGTT | 1                |
| miR-144     | TACAGTATAGATGATGTACT     | 5                |
| miR-145     | GTCCAGTTTTCCAGGAATCCCTT  | 24               |
| miR-145*    | GGATTCTGGAATACTGTTCT     | 4                |
| miR-148     | TCAGTGCATTACAGAACTTTGT   | 18               |
| miR-148*    | AAGTCTGTGATACACTCCGAC    | 1                |
| miR-153b    | TTGCATAGTACAAAAATGAGC    | 18               |
| miR-153b*   | GTCATTTTGTGGT TTGCAGCT   | 2                |
| miR-16c     | TAGCAGCATGTAATATTGGAGT   | 7                |
| miR-16c*    | GCCTCCAATATTGCTCGTGCTG   | 3                |
| miR-17a     | CAAAGTGCTTACAGTGCAGGT    | 27               |
| miR-17a*    | ACTGCAGTGGAGGCACTTCAAG   | 1                |
| miR-181a    | AACATTCAACGCTGTCGGTGAGTT | 391              |
| miR-181a*   | ACCATCGACCGTTGACTGTACC   | 4                |
| miR-181b*   | ACTCACTGATCAATGAATGC     | 2                |
| miR-181b    | AACATTCAATTGCTGTCGGTGGTT | 148              |
| miR-181c    | CACATTCATTGCTGTCGGTGGG   | 26               |
| miR-181c*   | CTCGCCGGACAATGAATGAG     | 1                |
| miR-182     | TTTGGCAATGGTAGAACTCAC    | 30               |
| miR-182*    | TGGTTCTAGACTTGCCAACTA    | 3                |
| miR-183     | TATGGCACTGGTAGAATTCAC    | 35               |
| miR-183*    | TGAATTACCAAAGGGCCAT      | 1                |
| miR-184     | TGGACGGAGAAGTATAAGGG     | 30               |
| miR-184*    | TCCTTATCACTTTTCCAGCCCAG  | 1                |
| miR-187     | TCGTGTCTTGTGTGACGCCAG    | 48               |
| miR-187*    | GGCTGCAACACAGGACATGG     | 2                |
| miR-18a*    | ACTGCCCTAAGTGCTCCTCTG    | 1                |
| miR-18a     | TAAGGTGCATCTAGTGCAGATAG  | 17               |

|            |                          |      |
|------------|--------------------------|------|
| miR-18c    | TAAGGTGCATCTTGTGTAGTTAG  | 5    |
| miR-18c*   | TACTGCGCTAGATGTTCCTTTTG  | 2    |
| miR-192    | ATGACCTATGAATTGACAGCCA   | 49   |
| miR-192*   | CCTGTCAGTTCGTAGGCCACTG   | 4    |
| miR-193b*  | GACTTTGGGGGCGAGATG       | 1    |
| miR-193b   | AACTGGCCCGAAAAGTCCCGCT   | 6    |
| miR-194b*  | TGGAGAAGCTGTTACCTG       | 1    |
| miR-194b   | TGTAACAGCCGCTCCATGTGGA   | 1    |
| miR-196a   | TAGGTAGTTTCATGTTGTGGG    | 4    |
| miR-196a*  | CTGCAACGTGAAAAGTCTTAA    | 1    |
| miR-199    | CCCAGTGTTCAGACTACCTGTCA  | 197  |
| miR-199*   | ACAGTAGTCTGCACATTGGTT    | 42   |
| miR-19d    | TGTGCAAAACCCATGCAAACTGA  | 46   |
| miR-19d*   | AGCTTTGCGGGGTGGCAGTCAGC  | 1    |
| miR-203b   | TGAAATGTTCCAGGACCACTTG   | 194  |
| miR-203b*  | AGTGGTTCTCAACAGTTCAACAGT | 19   |
| miR-20a    | TAAAGTGCTTATAGTGCAGGTAG  | 43   |
| miR-20a*   | ACTGCAGTGTGAGCACTTGAAG   | 5    |
| miR-210    | CTGTGCGTGTGACAGCGGCT     | 74   |
| miR-210*   | AGCCACTGACTAACGCACATTG   | 6    |
| miR-212*   | ACCTGGCTCTAGACTGCTTACT   | 35   |
| miR-212    | TAACAGTCTACAGTCATGGCTAC  | 8    |
| miR-214    | ACAGCAGGCACAGACAGGCAG    | 3    |
| miR-214*   | GCCTGTCTACACTTGCTGTGC    | 3    |
| miR-216a   | TAATCTCAGCTGGCAACTGTGA   | 27   |
| miR-216a*  | CACAGGCGCTGTGGGGTTCTG    | 1    |
| miR-218a*  | ATGGTTCCGTC AAGCACCAGG   | 1    |
| miR-218a   | TTGTGCTTGATCTAACCATGTG   | 67   |
| miR-219    | TGATTGTCCAAACGCAATCTTG   | 333  |
| miR-219*   | GGAGTTGTGGATGGACATCATG   | 2    |
| miR-222    | AGCTACATCTGGCTACTGGGTCTC | 181  |
| miR-222*   | TGCTCAGTAGTCAGTGTAGAT    | 1    |
| miR-22a*   | AGTTCCTCACTGGCAAGCTTT    | 9    |
| miR-22a    | AAAGTGCCAGCTGAAGAAGCTG   | 151  |
| miR-22b*   | CGTTCCTCACTGGCTAGCTTT    | 1    |
| miR-22b    | AAGCTGCCAGTTGAAGAGCTG    | 4    |
| miR-24     | TGGCTCAGTTCAGCAGGAACAGG  | 40   |
| miR-24*    | GTGCCCTTCTGAGCTGATATCAG  | 1    |
| miR-26a*   | CCTATTCATGATTACTTGCACT   | 1    |
| miR-26a    | TTCAAGTAATCCAGGATAGGCT   | 72   |
| miR-27d    | TTCACAGTGGCTAAGTTCTTC    | 3    |
| miR-27d*   | CAGAGCTTGGCTGATTGGTG     | 1    |
| miR-29b    | TAGCACCATTTGAAATCAGTGT   | 3    |
| miR-29b*   | GCTGAATTCAGATGGTGCCATAG  | 1    |
| miR-30c    | TGTAAACATCCTACACTCTCAGCT | 85   |
| miR-30c*   | CCGGGAGTGGGATGTTTTG      | 1    |
| miR-30e*   | CTTTCAGTCGGATGTTGCAGC    | 16   |
| miR-30e    | TGTAAACATCCTTGACTGGAAGCT | 29   |
| miR-455*   | ATGCAGTCCATGGGCATATACAC  | 8    |
| miR-455    | TATGTGCCCTTGACTACATCG    | 4    |
| miR-460-3p | CACAGCGCATACAATGTGGATG   | 1    |
| miR-460-5p | CCTGCATTGTACACACTGTGCG   | 2    |
| miR-9      | TCTTTGGTTATCTAGCTGTATG   | 1121 |
| miR-9*     | TAAAGCTAGATAACCGAAAGT    | 157  |
| miR-92b*   | AGGTGTGGGATGTTGTGCAGTGT  | 1    |
| miR-92b    | TATTGCACTCGTCCCGCCTCC    | 6    |

Table S6. miRNA and star sequences of new miRNAs

| miRNA           | sequence                    | brain | larvae | total clones | tested | detection         | miRNA |
|-----------------|-----------------------------|-------|--------|--------------|--------|-------------------|-------|
| >dre-miR-724-3p | CAGCCACACCTTCCTTTAAG        | 1     | 0      | 1            | yes    | no                |       |
| >dre-miR-724-5p | TTAAAGGGAATTTGCGACTGTT      | 20    | 0      | 20           | yes    | northern          | 5p    |
| >dre-miR-726-3p | TTCACACTAGCAGAACTCGG        | 3     | 0      | 3            | yes    | northern          | 3p    |
| >dre-miR-726-5p | GGAATCCGCTAGTTCTGAAGT       | 1     | 1      | 2            | yes    | no                |       |
| >dre-miR-727-3p | GTTGAGGCGAGTTGAAGACTTA      | 8     | 4      | 12           | yes    | northern          | 3p    |
| >dre-miR-727-5p | TCAGTCTCAATTCCTCCAGC        | 5     | 0      | 5            | yes    | northern          |       |
| >ZF_nl_210_3p   | TCGTAACAAGGTTCCGT           | 1     | 0      | 1            | no     |                   |       |
| >ZF_nl_210_5p   | TGAGCGGCTCAGTGAGGTCCTCGGATC | 1     | 0      | 1            | no     |                   | 5p    |
| >dre-miR-34c-3p | AATCACTAACCTCACTACCAGG      | 0     | 1      | 1            | yes    | no                |       |
| >dre-miR-34c-5p | AGGCAGTGCAGTTAGTTGATTAC     | 0     | 1      | 1            | yes    | northern, in situ | 5p    |
| >dre-miR-730-3p | CACAGCGCCTGCAATGTGGAGG      | 1     | 0      | 1            | yes    | no                |       |
| >dre-miR-730-5p | TCCTCATTGTGCATGCTGTGTGT     | 9     | 3      | 12           | yes    | northern          | 5p    |
| >ZF_nl_302_3p   | CTCGTACCGTGAGTAATAGTGC      | 8     | 10     | 18           | no     |                   | 3p    |
| >ZF_nl_302_5p   | CATTATTACTTTTGGTACGCG       | 2     | 0      | 2            | no     |                   |       |
| >ZF_nl_350_3p   | ATGCAGTCCATGGGCATATACACT    | 3     | 6      | 9            | no     |                   | 3p    |
| >ZF_nl_350_5p   | TATGTGCCCTTGGACTACATTGT     | 6     | 1      | 7            | no     |                   |       |
| >dre-miR-735-3p | CTCTCCCACCGCTAAACTTGAC      | 1     | 0      | 1            | yes    | northern, in situ | 3p    |
| >dre-miR-735-5p | GGCTGGTCCGAAGCGGTGGGTTAGTC  | 18    | 0      | 18           | no     |                   |       |
| >dre-miR-723-3p | AAGACATCAATTAATCTGTGCT      | 3     | 2      | 5            | yes    | northern          | 3p    |
| >dre-miR-723-5p | GACAGTTTTAAATGATGTTACTTT    | 0     | 1      | 1            | yes    | northern          |       |
| >dre-miR-737-3p | AATCAAACCTAAAGAAAATA        | 0     | 1      | 1            | yes    | northern          | 3p    |
| >dre-miR-737-5p | GTTTTTTAGGTTTTGATTTT        | 0     | 6      | 6            | no     |                   |       |

Table S7. Overview of miRNA cloning and expression

|                                     | known | new    |       |
|-------------------------------------|-------|--------|-------|
| miRNAs in registry                  | 168   |        |       |
| miRNA genes in registry             | 369   |        |       |
| miRNAs cloned                       | 139   | 66     |       |
| star sequences cloned               | 65    | 11     |       |
| miRNA genes                         | 255   | 116    |       |
| analyzed miRNAs                     | 32    | 35     |       |
| analyzed star sequences             | 0     | 6      |       |
| miRNAs detected in situ             | 24    | 4      |       |
| star sequences detected in situ     | 0     | 0      |       |
| miRNAs detected on Northern         | 30    | 23     |       |
| star sequences detected on Northern | 0     | 2      |       |
|                                     | brain | larvae | total |
| known miRNAs cloned                 | 136   | 129    | 139   |
| of which found in both libraries    |       |        | 126   |
| new miRNAs cloned                   | 47    | 38     | 66    |
| of which found in both libraries    |       |        | 19    |
